# Supplementary material for: Physiological and Antioxidant Response to Different Water Deficit Regimes of Flag Leaves and Ears of Wheat Grown under Combined Elevated CO2 and High Temperature
Source: Plants (Basel). 2022 Sep 13;11(18):2384. doi: 10.3390/plants11182384 (PMC9504337; doi:10.3390/plants11182384)
Supplement: Supplementary file 1 [file plants-11-02384-s001.zip › Spreadsheet S1_plants-1881609.xlsx]

## Sheet: MFA
Correlation and contributions between the individuals, continous variables, the variable groups and the supplementary group with the first two dimensions of the multiple facotrial analysis
Abreviations
Dim.: Dimension; Contr.: contribution; Corr.: correlation
DW: dry weight; FW: fresh weight; MC%: moisture content percentage; Pro: proline content; ASA: total content of ascorbate; GSH: total content of glutathione; SOD: superoxide dismutase; CAT: ctalase; APX: ascorbate peroxidase; DHAR: dehydroascorbate reductase; MDHAR: monodehydroascorbate reductase; GR: glutathione reductase
Two factors (or suplementary groups) were defined: ORGAN, which included and ear data, and TREATMENT including three treatments: control; long water deficit (LMW) and terminal water deficit (TWD)
Continous variables were split up into four groups: Antioxidant Enzymes (CAT, SOD, APS, DHAR, MDHAR, GR), Biomass (FW, DW, MC%), Metabolites (Pro, ASA, GSH), Morphology (Area and DMA)
Multifactorial analysis for the effect of the organ and water deficit treatments (Figure S1)
**Results of the Multiple Factor Analysis (MFA)**
The analysis was performed on 24 individuals, described by 16 variables
Eigenvalues
	Dim.1	Dim.2	Dim.3	Dim.4	Dim.5	Dim.6	Dim.7	Dim.8	Dim.9	Dim.10	Dim.11	Dim.12	Dim.13	Dim.14
Variance	3.193	1.39	0.473	0.389	0.296	0.204	0.15	0.096	0.064	0.045	0.021	0.006	0.003	0.001
% of var.	50.436	21.959	7.466	6.149	4.676	3.219	2.377	1.51	1.008	0.714	0.327	0.095	0.049	0.016
Cumulative % of var.	50.436	72.395	79.861	86.009	90.685	93.904	96.28	97.79	98.798	99.512	99.839	99.935	99.984	100
Groups
	Dim.1	ctr	cos2	Dim.2	ctr	cos2	Dim.3	ctr	cos2
Antioxidant Enzymes	0.883	27.643	0.574	0.408	29.338	0.122	0.28	59.297	0.058
Metabolites	0.417	13.055	0.149	0.494	35.53	0.209	0.188	39.836	0.03
Biomass	0.939	29.413	0.705	0.376	27.082	0.113	0.001	0.304	0
Morphology	0.954	29.889	0.89	0.112	8.05	0.012	0.003	0.563	0
Supplementary groups
	Dim.1	cos2	Dim.2	cos2	Dim.3	cos2
ORGAN	0.946	0.895	0.022	0	0.007	0
TREATMENT	0	0	0.369	0.068	0.075	0.003
Continuous variables
	Dim.1	ctr	cos2	Dim.2	ctr	cos2	Dim.3	ctr	cos2
DMA	0.925	15.448	0.855	-0.199	1.647	0.04	-0.029	0.099	0.001
DW	0.959	14.461	0.919	0.19	1.306	0.036	0.011	0.012	0
Area	0.894	14.441	0.8	0.393	6.403	0.154	0.062	0.464	0.004
FW	0.956	14.388	0.914	0.226	1.839	0.051	0.046	0.222	0.002
DHAR	0.937	9.611	0.878	0.174	0.761	0.03	-0.032	0.075	0.001
APX	0.87	8.275	0.756	0.019	0.009	0	-0.002	0	0
SOD	0.847	7.85	0.717	0.175	0.765	0.03	0.008	0.005	0
GSH	-0.623	6.372	0.388	0.418	6.588	0.175	0.246	6.706	0.06
Proline	0.549	4.952	0.301	-0.482	8.766	0.232	0.521	30.103	0.271
ASA	-0.325	1.731	0.105	0.731	20.176	0.535	0.165	3.027	0.027
CAT	-0.315	1.085	0.099	-0.693	12.074	0.48	-0.074	0.404	0.005
MDHAR	-0.257	0.724	0.066	0.364	3.336	0.133	0.723	38.677	0.523
MC%	-0.189	0.564	0.036	0.814	23.936	0.662	0.026	0.071	0.001
GR	-0.094	0.097	0.009	-0.702	12.392	0.493	0.522	20.135	0.272
Multifactorial analysis for the effect of water deficit treatments on the flag leaf (Figure 1A, B, C)
**Results of the Multiple Factor Analysis (MFA)**
The analysis was performed on 12 individuals, described by 15 variables
Eigenvalues
	Dim.1	Dim.2	Dim.3	Dim.4	Dim.5	Dim.6	Dim.7	Dim.8	Dim.9	Dim.10	Dim.11
Variance	3.622	0.804	0.465	0.288	0.177	0.132	0.052	0.043	0.016	0.01	0.007
% of var.	64.495	14.318	8.273	5.13	3.155	2.357	0.932	0.769	0.281	0.174	0.116
Cumulative % of var.	64.495	78.813	87.086	92.216	95.371	97.728	98.66	99.429	99.71	99.884	100
Groups
	Dim.1	ctr	cos2	Dim.2	ctr	cos2	Dim.3	ctr	cos2
Antioxidant Enzymes	0.817	22.546	0.495	0.397	49.375	0.117	0.401	86.365	0.119
Metabolites	0.926	25.562	0.725	0.35	43.56	0.104	0.055	11.846	0.003
Biomass	0.94	25.947	0.882	0.011	1.312	0	0.004	0.944	0
Morphology	0.94	25.944	0.881	0.046	5.753	0.002	0.004	0.845	0
Supplementary group
	Dim.1	cos2	Dim.2	cos2	Dim.3	cos2
TREATMENT	0.867	0.376	0.055	0.001	0.5	0.125
Continuous variables
	Dim.1	ctr	cos2	Dim.2	ctr	cos2	Dim.3	ctr	cos2
Area	0.96	13.284	0.922	0.096	0.598	0.009	-0.078	0.682	0.006
DMA	-0.938	12.661	0.879	-0.282	5.155	0.079	-0.038	0.163	0.001
ASA	0.915	11.35	0.837	-0.098	0.586	0.01	-0.147	2.285	0.022
MC%	0.975	9.149	0.95	0.155	1.04	0.024	0.022	0.035	0
FW	0.959	8.851	0.919	-0.044	0.085	0.002	-0.01	0.007	0
Proline	-0.792	8.505	0.627	0.478	13.951	0.228	0.296	9.266	0.088
DW	0.909	7.948	0.825	-0.065	0.186	0.004	0.11	0.902	0.012
DHAR	0.867	7.093	0.751	0.21	1.874	0.044	0.286	6.042	0.082
GR	-0.813	6.25	0.662	0.519	11.462	0.269	0.113	0.94	0.013
GSH	0.649	5.706	0.421	0.689	29.023	0.475	0.053	0.295	0.003
CAT	-0.746	5.254	0.556	0.372	5.889	0.138	-0.366	9.864	0.134
SOD	0.459	1.989	0.211	-0.538	12.323	0.29	0.544	21.77	0.296
APX	-0.381	1.372	0.145	-0.11	0.519	0.012	0.783	45.189	0.614
MDHAR	0.25	0.588	0.062	0.638	17.308	0.407	0.186	2.561	0.035
Multifactorial analysis for the effect of water deficit treatments on the ear (Figure 1D, E, F)
**Results of the Multiple Factor Analysis (MFA)**
The analysis was performed on 12 individuals, described by 15 variables
Eigenvalues
	Dim.1	Dim.2	Dim.3	Dim.4	Dim.5	Dim.6	Dim.7	Dim.8	Dim.9	Dim.10	Dim.11
Variance	2.492	1.436	1.165	0.592	0.488	0.283	0.214	0.181	0.1	0.04	0.011
% of var.	35.593	20.506	16.632	8.451	6.972	4.042	3.06	2.587	1.427	0.574	0.157
Cumulative % of var.	35.593	56.099	72.731	81.182	88.154	92.195	95.255	97.842	99.269	99.843	100
Groups
	Dim.1	ctr	cos2	Dim.2	ctr	cos2	Dim.3	ctr	cos2
Antioxidant Enzymes	0.124	4.956	0.008	0.869	60.526	0.399	0.546	46.923	0.158
Metabolites	0.526	21.117	0.21	0.502	34.99	0.191	0.317	27.213	0.076
Biomass	0.937	37.593	0.868	0.027	1.88	0.001	0.058	4.999	0.003
Morphology	0.905	36.334	0.761	0.037	2.604	0.001	0.243	20.865	0.055
Supplementary group
	Dim.1	cos2	Dim.2	cos2	Dim.3	cos2
TREATMENT	0.822	0.338	0.101	0.005	0.477	0.114
Continuous variables
	Dim.1	ctr	cos2	Dim.2	ctr	cos2	Dim.3	ctr	cos2
DMA	0.96	23.618	0.921	-0.219	2.141	0.048	-0.091	0.455	0.008
GSH	0.763	13.927	0.583	0.399	6.611	0.159	-0.069	0.246	0.005
Moisture	-0.927	12.922	0.859	0.231	1.396	0.053	0.072	0.168	0.005
Area	0.704	12.716	0.496	0.102	0.464	0.01	0.61	20.411	0.372
DW	0.915	12.61	0.838	-0.135	0.478	0.018	0.063	0.128	0.004
FW	0.895	12.061	0.802	-0.014	0.005	0	0.382	4.703	0.146
Proline	-0.529	6.69	0.28	-0.125	0.647	0.016	0.718	26.351	0.515
GR	-0.247	1.147	0.061	0.435	6.176	0.189	0.431	7.482	0.186
MDHAR	-0.238	1.068	0.057	0.715	16.703	0.512	-0.374	5.627	0.14
DHAR	0.237	1.052	0.056	-0.559	10.187	0.312	-0.538	11.633	0.289
APX	-0.223	0.935	0.05	-0.47	7.21	0.221	-0.28	3.152	0.078
CAT	-0.176	0.581	0.031	-0.761	18.909	0.579	0.085	0.292	0.007
ASA	0.145	0.5	0.021	0.818	27.732	0.668	-0.11	0.616	0.012
SOD	-0.096	0.174	0.009	-0.203	1.341	0.041	0.682	18.736	0.466

## Sheet: Correlation analyses
Correlation between continous variables
Data (rs) was generated from Spearman correlation analysis
Abreviations
DW: dry weight; FW: fresh weight; MC%: moisture content percentage; Pro: proline content; ASA: total content of ascorbate; GSH: total content of glutathione; SOD: superoxide dismutase; CAT: ctalase; APX: ascorbate peroxidase; DHAR: dehydroascorbate reductase; MDHAR: monodehydroascorbate reductase; GR: glutathione reductase
Correlation analysis for the effect of the organ and water deficit treatments
Correlation matrix
	CAT	SOD	GR	APX	DHAR	MDHAR	ASA	GSH	Proline	FW	DW	MC%	Area	DMA
CAT	1	-0.48	0.23	-0.32	-0.47	-0.26	-0.34	-0.01	0.18	-0.48	-0.52	-0.26	-0.49	-0.19
SOD	-0.48	1	0.03	0.74	0.81	-0.22	-0.17	-0.44	0.43	0.82	0.82	-0.24	0.79	0.76
GR	0.23	0.03	1	0.13	-0.22	0.08	-0.42	-0.17	0.67	-0.15	-0.14	-0.53	-0.08	0.17
APX	-0.32	0.74	0.13	1	0.77	-0.11	-0.46	-0.47	0.6	0.71	0.7	-0.32	0.73	0.74
DHAR	-0.47	0.81	-0.22	0.77	1	-0.12	-0.14	-0.41	0.27	0.8	0.8	-0.13	0.77	0.72
MDHAR	-0.26	-0.22	0.08	-0.11	-0.12	1	0.35	0.34	-0.08	-0.19	-0.17	0.27	-0.15	-0.28
ASA	-0.34	-0.17	-0.42	-0.46	-0.14	0.35	1	0.42	-0.64	-0.03	-0.04	0.51	-0.06	-0.35
GSH	-0.01	-0.44	-0.17	-0.47	-0.41	0.34	0.42	1	-0.52	-0.24	-0.25	0.43	-0.25	-0.56
Proline	0.18	0.43	0.67	0.6	0.27	-0.08	-0.64	-0.52	1	0.25	0.23	-0.57	0.3	0.52
FW	-0.48	0.82	-0.15	0.71	0.8	-0.19	-0.03	-0.24	0.25	1	0.99	-0.11	0.97	0.75
DW	-0.52	0.82	-0.14	0.7	0.8	-0.17	-0.04	-0.25	0.23	0.99	1	-0.11	0.96	0.74
MC%	-0.26	-0.24	-0.53	-0.32	-0.13	0.27	0.51	0.43	-0.57	-0.11	-0.11	1	-0.07	-0.69
Area	-0.49	0.79	-0.08	0.73	0.77	-0.15	-0.06	-0.25	0.3	0.97	0.96	-0.07	1	0.7
DMA	-0.19	0.76	0.17	0.74	0.72	-0.28	-0.35	-0.56	0.52	0.75	0.74	-0.69	0.7	1
Sample Size
[1] 24
Probability values (Entries above the diagonal are adjusted for multiple tests.)
	CAT	SOD	GR	APX	DHAR	MDHAR	ASA	GSH	Proline	FW	DW	MC%	Area	DMA
CAT	0	0.05	0.41	0.23	0.05	0.37	0.2	0.95	0.54	0.05	0.03	0.37	0.04	0.51
SOD		0	0.91	0	0	0.44	0.55	0.07	0.08	0	0	0.4	0	0
GR			0	0.65	0.44	0.78	0.09	0.55	0	0.6	0.63	0.03	0.78	0.56
APX				0	0	0.68	0.06	0.05	0.01	0	0	0.23	0	0
DHAR					0	0.66	0.61	0.09	0.33	0	0	0.63	0	0
MDHAR						0	0.19	0.2	0.78	0.5	0.56	0.33	0.61	0.33
ASA							0	0.09	0	0.91	0.88	0.03	0.81	0.19
GSH								0	0.03	0.39	0.37	0.08	0.38	0.02
Proline									0	0.38	0.41	0.01	0.28	0.03
FW										0	0	0.68	0	0
DW											0	0.68	0	0
MC%												0	0.8	0
Area													0	0
DMA														0
Correlation analysis for the effect of water deficit treatments on the flag leaf
Correlation matrix
	CAT	SOD	GR	APX	DHAR	MDHAR	AsA	GSH	Pro	FW	DW	MC%	Area	DMA
CAT	1	-0.52	0.79	-0.18	-0.86	-0.33	-0.63	-0.18	0.69	-0.58	-0.63	-0.51	-0.65	0.57
SOD	-0.52	1	-0.44	0.24	0.69	-0.2	0.31	-0.06	-0.42	0.31	0.34	-0.06	0.08	-0.01
GR	0.79	-0.44	1	0.25	-0.67	-0.01	-0.78	0.12	0.93	-0.69	-0.73	-0.48	-0.57	0.41
APX	-0.18	0.24	0.25	1	0.15	0.01	-0.45	-0.06	0.49	-0.15	-0.14	-0.29	-0.1	0.16
DHAR	-0.86	0.69	-0.67	0.15	1	0.06	0.49	0.28	-0.69	0.6	0.62	0.37	0.51	-0.38
MDHAR	-0.33	-0.2	-0.01	0.01	0.06	1	0.23	0.32	0	-0.1	-0.05	0.33	0.26	-0.37
AsA	-0.63	0.31	-0.78	-0.45	0.49	0.23	1	0.08	-0.8	0.67	0.71	0.57	0.54	-0.55
GSH	-0.18	-0.06	0.12	-0.06	0.28	0.32	0.08	1	-0.09	0.44	0.38	0.71	0.64	-0.72
Pro	0.69	-0.42	0.93	0.49	-0.69	0	-0.8	-0.09	1	-0.72	-0.75	-0.57	-0.6	0.48
FW	-0.58	0.31	-0.69	-0.15	0.6	-0.1	0.67	0.44	-0.72	1	0.99	0.78	0.84	-0.7
DW	-0.63	0.34	-0.73	-0.14	0.62	-0.05	0.71	0.38	-0.75	0.99	1	0.75	0.85	-0.69
MC%	-0.51	-0.06	-0.48	-0.29	0.37	0.33	0.57	0.71	-0.57	0.78	0.75	1	0.93	-0.96
Area	-0.65	0.08	-0.57	-0.1	0.51	0.26	0.54	0.64	-0.6	0.84	0.85	0.93	1	-0.92
DMA	0.57	-0.01	0.41	0.16	-0.38	-0.37	-0.55	-0.72	0.48	-0.7	-0.69	-0.96	-0.92	1
Sample Size
[1] 12
Probability values (Entries above the diagonal are adjusted for multiple tests.)
	CAT	SOD	GR	APX	DHAR	MDHAR	AsA	GSH	Pro	FW	DW	MC%	Area	DMA
CAT	0	0.17	0.02	0.72	0.01	0.45	0.08	0.72	0.05	0.12	0.08	0.19	0.07	0.13
SOD		0	0.27	0.59	0.05	0.7	0.48	0.91	0.31	0.47	0.43	0.91	0.9	0.98
GR			0	0.58	0.06	0.98	0.02	0.84	0	0.05	0.04	0.22	0.13	0.31
APX				0	0.78	0.98	0.27	0.91	0.21	0.79	0.8	0.52	0.88	0.77
DHAR					0	0.91	0.21	0.53	0.05	0.1	0.09	0.38	0.19	0.37
MDHAR						0	0.62	0.46	1	0.88	0.92	0.45	0.57	0.38
AsA							0	0.9	0.02	0.06	0.05	0.13	0.16	0.15
GSH								0	0.89	0.27	0.37	0.05	0.08	0.04
Pro									0	0.04	0.03	0.13	0.1	0.22
FW										0	0	0.02	0.01	0.05
DW											0	0.03	0.01	0.05
MC%												0	0	0
Area													0	0
DMA														0
Correlation analysis for the effect of water deficit treatments on the ear
Correlation matrix
	CAT	SOD	GR	APX	DHAR	MDHAR	AsA	GSH	Pro	FW	DW	MC%	Area	DMA
CAT	1	0	-0.38	0.3	0.36	-0.34	-0.31	-0.36	0.24	-0.05	-0.17	0	-0.03	0.11
SOD	0	1	0.29	-0.27	-0.15	-0.34	-0.08	0.06	0.27	0.29	0.25	-0.27	0.24	0.24
GR	-0.38	0.29	1	-0.43	-0.67	0.17	0.17	-0.28	0.29	-0.2	-0.02	0.4	-0.1	-0.47
APX	0.3	-0.27	-0.43	1	-0.02	-0.17	-0.51	0.02	0.11	-0.2	-0.27	0.22	-0.08	-0.16
DHAR	0.36	-0.15	-0.67	-0.02	1	-0.22	-0.3	-0.21	-0.2	-0.2	-0.23	-0.31	-0.38	0.25
MDHAR	-0.34	-0.34	0.17	-0.17	-0.22	1	0.42	0.36	-0.08	-0.22	-0.18	0.41	-0.34	-0.33
AsA	-0.31	-0.08	0.17	-0.51	-0.3	0.42	1	0.31	-0.31	0.23	0.13	-0.06	0.24	0.08
GSH	-0.36	0.06	-0.28	0.02	-0.21	0.36	0.31	1	-0.5	0.62	0.57	-0.39	0.48	0.52
Pro	0.24	0.27	0.29	0.11	-0.2	-0.08	-0.31	-0.5	1	-0.26	-0.34	0.53	-0.06	-0.53
FW	-0.05	0.29	-0.2	-0.2	-0.2	-0.22	0.23	0.62	-0.26	1	0.94	-0.73	0.92	0.8
DW	-0.17	0.25	-0.02	-0.27	-0.23	-0.18	0.13	0.57	-0.34	0.94	1	-0.72	0.83	0.73
MC%	0	-0.27	0.4	0.22	-0.31	0.41	-0.06	-0.39	0.53	-0.73	-0.72	1	-0.52	-0.96
Area	-0.03	0.24	-0.1	-0.08	-0.38	-0.34	0.24	0.48	-0.06	0.92	0.83	-0.52	1	0.58
DMA	0.11	0.24	-0.47	-0.16	0.25	-0.33	0.08	0.52	-0.53	0.8	0.73	-0.96	0.58	1
Sample Size
[1] 12
Probability values (Entries above the diagonal are adjusted for multiple tests.)
	CAT	SOD	GR	APX	DHAR	MDHAR	AsA	GSH	Pro	FW	DW	MC%	Area	DMA
CAT	0	1	0.73	0.73	0.73	0.73	0.73	0.73	0.73	0.94	0.77	1	0.97	0.87
SOD		0	0.73	0.73	0.81	0.73	0.91	0.92	0.73	0.73	0.73	0.73	0.73	0.73
GR			0	0.69	0.17	0.77	0.77	0.73	0.73	0.74	0.97	0.73	0.9	0.57
APX				0	0.97	0.77	0.48	0.97	0.87	0.74	0.73	0.74	0.91	0.78
DHAR					0	0.73	0.73	0.74	0.74	0.75	0.73	0.73	0.73	0.73
MDHAR						0	0.72	0.73	0.91	0.73	0.77	0.73	0.73	0.73
AsA							0	0.73	0.73	0.73	0.84	0.92	0.73	0.91
GSH								0	0.48	0.28	0.39	0.73	0.57	0.48
Pro									0	0.73	0.73	0.48	0.92	0.48
FW										0	0	0.09	0	0.03
DW											0	0.09	0.02	0.09
MC%												0	0.48	0
Area													0	0.39
DMA														0

## Sheet: One-way ANOVA - Treatments
Tables of one-way ANOVA analysis results for effect of water deficit treatments
3.2. Biomass and morphology (Figure 2)
Fresh Weigth (FW)
Flag leaf																Ear
ANOVA									Normality assumption							ANOVA									Normality assumption
Coefficient covariances computed by hccm()									Shapiro test							Coefficient covariances computed by hccm()									Shapiro test
ANOVA Table (type II tests)									TREATMENT	variable	statistic	p				ANOVA Table (type II tests)									TREATMENT	variable	statistic	p
	Effect	DFn	DFd	F	p	p<.05	ges		<fctr>	<chr>	<dbl>						Effect	DFn	DFd	F	p	p<.05	ges		<fctr>	<chr>	<dbl>
1	F1	2	9	20.484	0	*	0.82		Control	FW	0.839594	0.194222				1	F1	2	9	4.572	0.04	*	0.504		Control	FW	0.860058	0.260424
	Df	Sum Sq	Mean Sq	F value	Pr(>F)				LWD	FW	0.967124	0.823603					Df	Sum Sq	Mean Sq	F value	Pr(>F)				LWD	FW	0.954807	0.746239
data$F1	2	0.16019	0.0801	20.48	0.000447	***			TWD	FW	0.991186	0.963466				data$F1	2	1.297	0.6484	4.572	0.0426	*			TWD	FW	0.944731	0.683372
Residuals	9	0.03519	0.00391													Residuals	9	1.276	0.1418
---									Homogeneity of variance assumption							---									Homogeneity of variance assumption
Signif. codes: 0 ‘***’ 0.001 ‘**’ 0.01 ‘*’ 0.05 ‘.’ 0.1 ‘ ’ 1									Levene test							Signif. codes: 0 ‘***’ 0.001 ‘**’ 0.01 ‘*’ 0.05 ‘.’ 0.1 ‘ ’ 1									Levene test
[1] 0.0004466294									df1	df2	statistic	p				[1] 0.04263894									df1	df2	statistic	p
									<int>	<dbl>	<dbl>														<int>	<dbl>	<dbl>
Tukey test									2	9	0.305124	0.744364				Tukey test									2	9	1.37651	0.300898
	Letters																Letters
Control	b															Control	b
LWD	a															LWD	a
TWD	b															TWD	ab
Dry Weigth (DW)
Flag leaf																Ear
ANOVA									Normality assumption							ANOVA									Normality assumption
Coefficient covariances computed by hccm()									Shapiro test							Coefficient covariances computed by hccm()									Shapiro test
ANOVA Table (type II tests)									TREATMENT	variable	statistic	p				ANOVA Table (type II tests)									TREATMENT	variable	statistic	p
	Effect	DFn	DFd	F	p	p<.05	ges		<fctr>	<chr>	<dbl>						Effect	DFn	DFd	F	p	p<.05	ges		<fctr>	<chr>	<dbl>
1	F1	2	9	10.201	0	*	0.694		Control	DW	0.847981	0.219688				1	F1	2	9	9.806	0	*	0.685		Control	DW	0.910059	0.482717
	Df	Sum Sq	Mean Sq	F value	Pr(>F)				LWD	DW	0.810304	0.12202					Df	Sum Sq	Mean Sq	F value	Pr(>F)				LWD	DW	0.878234	0.331147
data$F1	2	0.00653	0.003265	10.2	0.00486	**			TWD	DW	0.953233	0.73636				data$F1	2	0.2509	0.1255	9.806	0.00549	*			TWD	DW	0.794492	0.0927034
Residuals	9	0.00288	0.00032													Residuals	9	0.1152	0.0128
---									Homogeneity of variance assumption							---									Homogeneity of variance assumption
Signif. codes: 0 ‘***’ 0.001 ‘**’ 0.01 ‘*’ 0.05 ‘.’ 0.1 ‘ ’ 1									Levene test							Signif. codes: 0 ‘***’ 0.001 ‘**’ 0.01 ‘*’ 0.05 ‘.’ 0.1 ‘ ’ 1									Levene test
[1] 0.004856767									df1	df2	statistic	p				[1] 0.005490824									df1	df2	statistic	p
									<int>	<dbl>	<dbl>														<int>	<dbl>	<dbl>
Tukey test									2	9	0.878668	0.448147				Tukey test									2	9	1.51233	0.271497
	Letters																Letters
Control	b															Control	b
LWD	a															LWD	a
TWD	b															TWD	a
Moisture content (MC%)
Flag leaf																Ear
Kruskal-Wallis variation of ANOVA with medians									Normality assumption							ANOVA with heteroscedasticity correction and piarwise.t test									Normality assumption
.y.	n	statistic	df	p	method				Shapiro test							Coefficient covariances computed by hccm()									Shapiro test
<chr>	<int>	<dbl>	<int>	<chr>	<chr>				TREATMENT	variable	statistic	p				ANOVA Table (type II tests)									TREATMENT	variable	statistic	p
variable	12	7.53846	2	0.02	Kruskal-Wallis				<fctr>	<chr>	<dbl>						Effect	DFn	DFd	F	p	p<.05			<fctr>	<chr>	<dbl>
									Control	MC%	0.86365	0.273493				1	F1	2	9	9.293	0.01	*			Control	MC%	0.951477	0.725352
Pairwise.Wilcox.Test									LWD	MC%	0.952828	0.733815					Control	LMWD	STWD						LWD	MC%	0.904336	0.452915
	Letters								TWD	MC%	0.749957	0.0385899				Control	1	0.0361614	0.0361614						TWD	MC%	0.943027	0.672869
Control	a															LWD	0.0361614	1	0.527088
LWD	b								Homogeneity of variance assumption							TWD	0.0361614	0.527088	1						Homogeneity of variance assumption
TWD	a								Levene test																Levene test
									df1	df2	statistic	p													df1	df2	statistic	p
Pairwise comparisons using Wilcoxon rank sum exact test									<int>	<dbl>	<dbl>														<int>	<dbl>	<dbl>
data: data$variable and data$F1									2	9	11.0413	0.0037824				Tukey test									2	9	5.29591	0.0301825
	Control	LWD															Letters
LWD	0.043	-														Control	a
TWD	0.686	0.043														LWD	b
P value adjustment method: fdr																TWD	b
	Control	LWD	TWD
Control	1	0.0428571	0.685714
LWD	0.0428571	1	0.0428571
TWD	0.685714	0.0428571	1
Area
Flag leaf																Ear
ANOVA									Normality assumption							ANOVA									Normality assumption
Coefficient covariances computed by hccm()									Shapiro test							Coefficient covariances computed by hccm()									Shapiro test
ANOVA Table (type II tests)									TREATMENT	variable	statistic	p				ANOVA Table (type II tests)									TREATMENT	variable	statistic	p
	Effect	DFn	DFd	F	p	p<.05	ges		<fctr>	<chr>	<dbl>						Effect	DFn	DFd	F	p	p<.05	ges		<fctr>	<chr>	<dbl>
1	F1	2	9	20	0	*	0.81		Control	Area	0.89	0.36				1	F1	2	9	1.911	0.2		0.298		Control	Area	0.88272	0.350384
	Df	Sum Sq	Mean Sq	F value	Pr(>F)				LWD	Area	0.96	0.77					Df	Sum Sq	Mean Sq	F value	Pr(>F)				LWD	Area	0.982969	0.919204
data$F1	2	296.3	148.2	19.6	0.00053	***			TWD	Area	0.91	0.51				data$F1	2	83.82	41.91	1.911	0.203				TWD	Area	0.892234	0.393516
Residuals	9	68.1	7.6													Residuals	9	197.4	21.93
---									Homogeneity of variance assumption							---									Homogeneity of variance assumption
Signif. codes: 0 ‘***’ 0.001 ‘**’ 0.01 ‘*’ 0.05 ‘.’ 0.1 ‘ ’ 1									Levene test							Signif. codes: 0 ‘***’ 0.001 ‘**’ 0.01 ‘*’ 0.05 ‘.’ 0.1 ‘ ’ 1									Levene test
[1] 0.00053									df1	df2	statistic	p				[1] 0.2034028									df1	df2	statistic	p
									<int>	<dbl>	<dbl>														<int>	<dbl>	<dbl>
Tukey test									2	9	0.41	0.68				Tukey test									2	9	2.77399	0.115207
	Letters																Letters
Control	b															Control	a
LWD	a															LWD	a
TWD	b															TWD	a
Dry matter per area (DMA)
Flag leaf																Ear
ANOVA									Normality assumption							ANOVA									Normality assumption
Coefficient covariances computed by hccm()									Shapiro test							Coefficient covariances computed by hccm()									Shapiro test
ANOVA Table (type II tests)									TREATMENT	variable	statistic	p				ANOVA Table (type II tests)									TREATMENT	variable	statistic	p
	Effect	DFn	DFd	F	p	p<.05	ges		<fctr>	<chr>	<dbl>						Effect	DFn	DFd	F	p	p<.05	ges		<fctr>	<chr>	<dbl>
1	F1	2	9	7.856	0.01	*	0.636		Control	DMA	0.91	0.494				1	F1	2	9	21.154	0	*	0.825		Control	DMA	0.844194	0.20791
	Df	Sum Sq	Mean Sq	F value	Pr(>F)				LWD	DMA	0.84	0.185					Df	Sum Sq	Mean Sq	F value	Pr(>F)				LWD	DMA	0.879881	0.338128
data$F1	2	0.0001935	9.675e-05	7.856	0.0106	*			TWD	DMA	0.72	0.017				data$F1	2	9.712e-05	4.856e-05	21.15	0.000397	***			TWD	DMA	0.915356	0.511235
Residuals	9	0.0001108	1.232e-05													Residuals	9	2.066e-05	2.3e-06
---									Homogeneity of variance assumption							---									Homogeneity of variance assumption
Signif. codes: 0 ‘***’ 0.001 ‘**’ 0.01 ‘*’ 0.05 ‘.’ 0.1 ‘ ’ 1									Levene test							Signif. codes: 0 ‘***’ 0.001 ‘**’ 0.01 ‘*’ 0.05 ‘.’ 0.1 ‘ ’ 1									Levene test
[1] 0.01061667									df1	df2	statistic	p				[1] 0.0003965304									df1	df2	statistic	p
									<int>	<dbl>	<dbl>														<int>	<dbl>	<dbl>
Tukey test									2	9	28	0.00013				Tukey test									2	9	0.25999	0.776657
	Letters																Letters
Control	b															Control	b
LWD	a															LWD	a
TWD	b															TWD	a
3.3. Chlorophyll and photosynthesis status (Figure 3 and Table 1)
Chlorophyll (Chl)
Flag leaf
ANOVA									Normality assumption
Coefficient covariances computed by hccm()									Shapiro test
ANOVA Table (type II tests)									TREATMENT	variable	statistic	p
	Effect	DFn	DFd	F	p	p<.05	ges		<fctr>	<chr>	<dbl>
1	F1	2	9	0.069	0.93		0.015		Control	Chl	0.89	0.375
	Df	Sum Sq	Mean Sq	F value	Pr(>F)				LWD	Chl	0.96	0.797
data$F1	2	1.3	0.64	0.07	0.93				TWD	Chl	0.7	0.011
Residuals	9	83	9.23
---									Homogeneity of variance assumption
Signif. codes: 0 ‘***’ 0.001 ‘**’ 0.01 ‘*’ 0.05 ‘.’ 0.1 ‘ ’ 1									Levene test
[1] 0.93									df1	df2	statistic	p
									<int>	<dbl>	<dbl>
Tukey test									2	9	1.5	0.28
	Letters
Control	a
LWD	a
TWD	a
Photosyntehsis assimilarion (A900)
Flag leaf
Kruskal-Wallis variation of ANOVA with medians for non-normality data									Normality assumption
.y.	n	statistic	df	p	method				Shapiro test
<chr>	<int>	<dbl>	<int>	<chr>	<chr>				TREATMENT	variable	statistic	p
variable	12	7.53846	2	0.02	Kruskal-Wallis				<fctr>	<chr>	<dbl>
									Control	A900	0.911003	0.487735
Pairwise.Wilcox.Test									LWD	A900	0.985533	0.933613
	Letters								TWD	A900	0.735809	0.0281853
Control	a
LWD	b								Homogeneity of variance assumption
TWD	b								Levene test
									df1	df2	statistic	p
Pairwise comparisons using Wilcoxon rank sum exact test									<int>	<dbl>	<dbl>
data: data$variable and data$F1									2	9	0.508933	0.617452
	Control	LWD
LWD	0.043	-
TWD	0.043	0.686
P value adjustment method: fdr
	Control	LWD	TWD
Control	1	0.0428571	0.0428571
LWD	0.0428571	1	0.685714
TWD	0.0428571	0.685714	1
Vmax
Flag leaf
ANOVA									Normality assumption
Coefficient covariances computed by hccm()									Shapiro test
ANOVA Table (type II tests)									TREATMENT	variable	statistic	p
	Effect	DFn	DFd	F	p	p<.05	ges		<fctr>	<chr>	<dbl>
1	F1	2	9	8.9	0.01	*	0.66		Control	Vcmax	0.98	0.91
	Df	Sum Sq	Mean Sq	F value	Pr(>F)				LWD	Vcmax	0.92	0.56
data$F1	2	1470	735	8.9	0.0074	**			TWD	Vcmax	0.97	0.87
Residuals	9	743	83
---									Homogeneity of variance assumption
Signif. codes: 0 ‘***’ 0.001 ‘**’ 0.01 ‘*’ 0.05 ‘.’ 0.1 ‘ ’ 1									Levene test
[1] 0.0074									df1	df2	statistic	p
									<int>	<dbl>	<dbl>
Tukey test									2	9	0.04	0.96
	Letters
Control	b
LWD	a
TWD	a
Jmax
Flag leaf
ANOVA variation with heteroscedasticity correction									Normality assumption
Coefficient covariances computed by hccm()									Shapiro test
ANOVA Table (type II tests)									TREATMENT	variable	statistic	p
	Effect	DFn	DFd	F	p	p<.05			<fctr>	<chr>	<dbl>
1	F1	2	9	9.73	0.01	*	0.68		Control	Jmax	0.844743	0.209588
	Control	LMWD	STWD						LWD	Jmax	0.976592	0.881769
Control	1	0.035995	0.035995						TWD	Jmax	0.917458	0.52279
LWD	0.035995	1	0.641131
TWD	0.035995	0.641131	1						Homogeneity of variance assumption
									Levene test
									df1	df2	statistic	p
									<int>	<dbl>	<dbl>
Pairwise.t.test post-hoc									2	9	10	0.00496825
	Letters
Control	b
LWD	a
TWD	a
gs900
Flag leaf
non-parametric test: Kruskal-Wallis variation of ANOVA with medians for non-normality data									Normality assumption
Pairwise comparisons using Wilcoxon rank sum exact test									Shapiro test
data: data$variable and data$F1									TREATMENT	variable	statistic	p
	Control	LWD							<fctr>	<chr>	<dbl>
LWD	0.3	-							Control	gs900	0.918413	0.52809
TWD	0.086	0.886							LWD	gs900	0.955032	0.747657
P value adjustment method: fdr									TWD	gs900	0.706318	0.0137192
	Control	LWD	TWD
Control	1	0.3	0.0857143						Homogeneity of variance assumption
LWD	0.3	1	0.0857143						Levene test
TWD	0.0857143	0.885714	1						df1	df2	statistic	p
									<int>	<dbl>	<dbl>
Pairwise.Wilcox.Test									2	9	3.72104	0.066418
	Letters
Control	a
LWD	a
TWD	a
E900
Flag leaf
ANOVA									Normality assumption
Coefficient covariances computed by hccm()									Shapiro test
ANOVA Table (type II tests)									TREATMENT	variable	statistic	p
	Effect	DFn	DFd	F	p	p<.05	ges		<fctr>	<chr>	<dbl>
1	F1	2	9	3.5	0.08		0.43		Control	E900	0.87	0.307
	Df	Sum Sq	Mean Sq	F value	Pr(>F)				LWD	E900	0.97	0.811
data$F1	2	11	5.51	3.46	0.077	.			TWD	E900	0.78	0.075
Residuals	9	14.3	1.59
---									Homogeneity of variance assumption
Signif. codes: 0 ‘***’ 0.001 ‘**’ 0.01 ‘*’ 0.05 ‘.’ 0.1 ‘ ’ 1									Levene test
[1] 0.077									df1	df2	statistic	p
									<int>	<dbl>	<dbl>
Tukey test									2	9	3.6	0.07
	Letters
Control	a
LWD	a
TWD	a
Ci900
Flag leaf
non-parametric test: Kruskal-Wallis variation of ANOVA with medians for non-normality data									Normality assumption
Pairwise comparisons using Wilcoxon rank sum exact test									Shapiro test
data: data$variable and data$F1									TREATMENT	variable	statistic	p
	Control	LWD							<fctr>	<chr>	<dbl>
LWD	0.49	-							Control	Ci900	0.721665	0.020188
TWD	0.49	0.17							LWD	Ci900	0.881849	0.346595
P value adjustment method: fdr									TWD	Ci900	0.86705	0.286268
	Control	LWD	TWD
Control	1	0.485714	0.485714						Homogeneity of variance assumption
LWD	0.485714	1	0.171429						Levene test
TWD	0.485714	0.171429	1						df1	df2	statistic	p
									<int>	<dbl>	<dbl>
Pairwise.Wilcox.Test									2	9	0.509799	0.616971
	Letters
Control	a
LWD	a
TWD	a
Water use effciency (WUE)
Flag leaf
ANOVA									Normality assumption
Coefficient covariances computed by hccm()									Shapiro test
ANOVA Table (type II tests)									TREATMENT	variable	statistic	p
	Effect	DFn	DFd	F	p	p<.05	ges		<fctr>	<chr>	<dbl>
1	F1	2	9	2.8	0.11		0.38		Control	WUE900	0.95	0.75
	Df	Sum Sq	Mean Sq	F value	Pr(>F)				LWD	WUE900	0.9	0.45
data$F1	2	0.632	0.316	2.8	0.11				TWD	WUE900	0.92	0.56
Residuals	9	1.014	0.113
---									Homogeneity of variance assumption
Signif. codes: 0 ‘***’ 0.001 ‘**’ 0.01 ‘*’ 0.05 ‘.’ 0.1 ‘ ’ 1									Levene test
[1] 0.11									df1	df2	statistic	p
									<int>	<dbl>	<dbl>
Tukey test									2	9	2.8	0.12
	Letters
Control	a
LWD	a
TWD	a
Rd
Flag leaf
ANOVA									Normality assumption
Coefficient covariances computed by hccm()									Shapiro test
ANOVA Table (type II tests)									TREATMENT	variable	statistic	p
	Effect	DFn	DFd	F	p	p<.05	ges		<fctr>	<chr>	<dbl>
1	F1	2	9	11	0	*	0.71		Control	Rd	0.93	0.59
	Df	Sum Sq	Mean Sq	F value	Pr(>F)				LWD	Rd	0.92	0.52
data$F1	2	2.415	1.21	11	0.0039	**			TWD	Rd	0.97	0.87
Residuals	9	0.992	0.11
---									Homogeneity of variance assumption
Signif. codes: 0 ‘***’ 0.001 ‘**’ 0.01 ‘*’ 0.05 ‘.’ 0.1 ‘ ’ 1									Levene test
[1] 0.0039									df1	df2	statistic	p
									<int>	<dbl>	<dbl>
Tukey test									2	9	1.2	0.35
	Letters
Control	a
LWD	b
TWD	b
3.4. Accumulation of metabolites with osmoprotectant and antioxidant roles (Figure 4)
Proline content (Pro)
Flag leaf																Ear
ANOVA									Normality assumption							ANOVA									Normality assumption
Coefficient covariances computed by hccm()									Shapiro test							Coefficient covariances computed by hccm()									Shapiro test
ANOVA Table (type II tests)									TREATMENT	variable	statistic	p				ANOVA Table (type II tests)									TREATMENT	variable	statistic	p
	Effect	DFn	DFd	F	p	p<.05	ges		<fctr>	<chr>	<dbl>						Effect	DFn	DFd	F	p	p<.05	ges		<fctr>	<chr>	<dbl>
1	F1	2	9	16.898	0	*	0.79		Control	Pro	0.881112	0.343408				1	F1	2	9	36.14	0	*	0.889		Control	Pro	0.807294	0.115957
	Df	Sum Sq	Mean Sq	F value	Pr(>F)				LWD	Pro	0.927294	0.578588					Df	Sum Sq	Mean Sq	F value	Pr(>F)				LWD	Pro	0.81355	0.128824
data$F1	2	13.308	6.654	16.9	0.000897	***			TWD	Pro	0.884974	0.360315				data$F1	2	18.55	9.275	36.14	5e-05	***			TWD	Pro	0.898758	0.424916
Residuals	9	3.544	0.394													Residuals	9	2.31	0.257
---									Homogeneity of variance assumption							---									Homogeneity of variance assumption
Signif. codes: 0 ‘***’ 0.001 ‘**’ 0.01 ‘*’ 0.05 ‘.’ 0.1 ‘ ’ 1									Levene test							Signif. codes: 0 ‘***’ 0.001 ‘**’ 0.01 ‘*’ 0.05 ‘.’ 0.1 ‘ ’ 1									Levene test
[1] 0.0008970413									df1	df2	statistic	p				[1] 5.002518e-05									df1	df2	statistic	p
									<int>	<dbl>	<dbl>														<int>	<dbl>	<dbl>
Tukey test									2	9	1.70972	0.234764				Tukey test									2	9	2.53764	0.13367
	Letters																Letters
Control	a															Control	a
LWD	b															LWD	a
TWD	a															TWD	b
Total content of ascorbate (ASA)
Flag leaf																Ear
ANOVA									Normality assumption							ANOVA									Normality assumption
Coefficient covariances computed by hccm()									Shapiro test							Coefficient covariances computed by hccm()									Shapiro test
ANOVA Table (type II tests)									TREATMENT	variable	statistic	p				ANOVA Table (type II tests)									TREATMENT	variable	statistic	p
	Effect	DFn	DFd	F	p	p<.05	ges		<fctr>	<chr>	<dbl>						Effect	DFn	DFd	F	p	p<.05	ges		<fctr>	<chr>	<dbl>
1	F1	2	9	16.898	0	*	0.79		Control	ASA	0.882063	0.347523				1	F1	2	9	0.443	0.66		0.09		Control	ASA	0.992084	0.967893
	Df	Sum Sq	Mean Sq	F value	Pr(>F)				LWD	ASA	0.876957	0.3258					Df	Sum Sq	Mean Sq	F value	Pr(>F)				LWD	ASA	0.919048	0.531625
data$F1	2	13.308	6.654	16.9	0.000897	***			TWD	ASA	0.852483	0.234303				data$F1	2	0.2485	0.1243	0.443	0.656				TWD	ASA	0.875367	0.319224
Residuals	9	3.544	0.394													Residuals	9	2.5271	0.2808
---									Homogeneity of variance assumption							---									Homogeneity of variance assumption
Signif. codes: 0 ‘***’ 0.001 ‘**’ 0.01 ‘*’ 0.05 ‘.’ 0.1 ‘ ’ 1									Levene test							Signif. codes: 0 ‘***’ 0.001 ‘**’ 0.01 ‘*’ 0.05 ‘.’ 0.1 ‘ ’ 1									Levene test
[1] 0.0008970413									df1	df2	statistic	p				[1] 0.6556757									df1	df2	statistic	p
									<int>	<dbl>	<dbl>														<int>	<dbl>	<dbl>
Tukey test									2	9	2.34535	0.151417				Tukey test									2	9	0.979137	0.412336
	Letters																Letters
Control	b															Control	a
LWD	a															LWD	a
TWD	b															TWD	a
Total content of glutathione (GSH)
Flag leaf																Ear
ANOVA									Normality assumption							ANOVA									Normality assumption
Coefficient covariances computed by hccm()									Shapiro test							Coefficient covariances computed by hccm()									Shapiro test
ANOVA Table (type II tests)									TREATMENT	variable	statistic	p				ANOVA Table (type II tests)									TREATMENT	variable	statistic	p
	Effect	DFn	DFd	F	p	p<.05	ges		<fctr>	<chr>	<dbl>						Effect	DFn	DFd	F	p	p<.05	ges		<fctr>	<chr>	<dbl>
1	F1	2	9	1.267	0.33		0.22		Control	GSH	0.960729	0.783495				1	F1	2	9	8.946	0.01	*	0.665		Control	GSH	0.959052	0.772946
	Df	Sum Sq	Mean Sq	F value	Pr(>F)				LWD	GSH	0.976439	0.880849					Df	Sum Sq	Mean Sq	F value	Pr(>F)				LWD	GSH	0.904558	0.454051
data$F1	2	0.008757	0.004378	1.267	0.328				TWD	GSH	0.878106	0.33061				data$F1	2	0.013637	0.006818	8.946	0.00726	**			TWD	GSH	0.954988	0.74738
Residuals	9	0.031106	0.003456													Residuals	9	0.006859	0.000762
---									Homogeneity of variance assumption							---									Homogeneity of variance assumption
Signif. codes: 0 ‘***’ 0.001 ‘**’ 0.01 ‘*’ 0.05 ‘.’ 0.1 ‘ ’ 1									Levene test							Signif. codes: 0 ‘***’ 0.001 ‘**’ 0.01 ‘*’ 0.05 ‘.’ 0.1 ‘ ’ 1									Levene test
[1] 0.3275201									df1	df2	statistic	p				[1] 0.00725686									df1	df2	statistic	p
									<int>	<dbl>	<dbl>														<int>	<dbl>	<dbl>
Tukey test									2	9	1.6144	0.25169				Tukey test									2	9	2.28234	0.157851
	Letters																Letters
Control	a															Control	b
LWD	a															LWD	a
TWD	a															TWD	a
3.5. Superoxide dismutase and catalase (Figure 5)
Superoxide dismutase activity (SOD)
Flag leaf																Ear
ANOVA									Normality assumption							ANOVA									Normality assumption
Coefficient covariances computed by hccm()									Shapiro test							Coefficient covariances computed by hccm()									Shapiro test
ANOVA Table (type II tests)									TREATMENT	variable	statistic	p				ANOVA Table (type II tests)									TREATMENT	variable	statistic	p
	Effect	DFn	DFd	F	p	p<.05	ges		<fctr>	<chr>	<dbl>						Effect	DFn	DFd	F	p	p<.05	ges		<fctr>	<chr>	<dbl>
1	F1	2	9	2.933	0.1		0.395		Control	SOD	0.954625	0.745097				1	F1	2	9	5.946	0.02	*	0.569		Control	SOD	0.910298	0.483982
	Df	Sum Sq	Mean Sq	F value	Pr(>F)				LWD	SOD	0.930593	0.597891					Df	Sum Sq	Mean Sq	F value	Pr(>F)				LWD	SOD	0.944754	0.683516
data$F1	2	978.7	489.3	2.933	0.105				TWD	SOD	0.874296	0.314846				data$F1	2	4748	2374.1	5.946	0.0226	*			TWD	SOD	0.963035	0.79799
Residuals	9	1501.7	166.9													Residuals	9	3593	399.3
---									Homogeneity of variance assumption							---									Homogeneity of variance assumption
Signif. codes: 0 ‘***’ 0.001 ‘**’ 0.01 ‘*’ 0.05 ‘.’ 0.1 ‘ ’ 1									Levene test							Signif. codes: 0 ‘***’ 0.001 ‘**’ 0.01 ‘*’ 0.05 ‘.’ 0.1 ‘ ’ 1									Levene test
[1] 0.104542									df1	df2	statistic	p				[1] 0.02260126									df1	df2	statistic	p
									<int>	<dbl>	<dbl>														<int>	<dbl>	<dbl>
Tukey test									2	9	1.87396	0.208743				Tukey test									2	9	1.87097	0.209186
	Letters																Letters
Control	a															Control	ab
LWD	a															LWD	a
TWD	a															TWD	b
Catalase activity (CAT)
Flag leaf																Ear
ANOVA									Normality assumption							ANOVA									Normality assumption
Coefficient covariances computed by hccm()									Shapiro test							Coefficient covariances computed by hccm()									Shapiro test
ANOVA Table (type II tests)									TREATMENT	variable	statistic	p				ANOVA Table (type II tests)									TREATMENT	variable	statistic	p
	Effect	DFn	DFd	F	p	p<.05	ges		<fctr>	<chr>	<dbl>						Effect	DFn	DFd	F	p	p<.05	ges		<fctr>	<chr>	<dbl>
1	F1	2	9	7.7	0.01	*	0.63		Control	CAT	0.962832	0.796719				1	F1	2	9	0.712	0.52		0.137		Control	CAT	0.881607	0.345546
	Df	Sum Sq	Mean Sq	F value	Pr(>F)				LWD	CAT	0.908317	0.473529					Df	Sum Sq	Mean Sq	F value	Pr(>F)				LWD	CAT	0.972266	0.85546
data$F1	2	46571	23286	7.68	0.011	*			TWD	CAT	0.924561	0.562813				data$F1	2	11693	5846	0.712	0.517				TWD	CAT	0.890347	0.384708
Residuals	9	27287	3032													Residuals	9	73944	8216
---									Homogeneity of variance assumption							---									Homogeneity of variance assumption
Signif. codes: 0 ‘***’ 0.001 ‘**’ 0.01 ‘*’ 0.05 ‘.’ 0.1 ‘ ’ 1									Levene test							Signif. codes: 0 ‘***’ 0.001 ‘**’ 0.01 ‘*’ 0.05 ‘.’ 0.1 ‘ ’ 1									Levene test
[1] 0.011									df1	df2	statistic	p				[1] 0.5165327									df1	df2	statistic	p
									<int>	<dbl>	<dbl>														<int>	<dbl>	<dbl>
Tukey test									2	9	1.55859	0.262292				Tukey test									2	9	1.13552	0.363289
	Letters																Letters
Control	b															Control	a
LWD	a															LWD	a
TWD	b															TWD	a
3.6. Ascorbate-glutathione cycle (Figure 6)
Ascorbate peroxidase activity (APX)
Flag leaf																Ear
ANOVA variation with heteroscedasticity correction									Normality assumption							ANOVA									Normality assumption
Coefficient covariances computed by hccm()									Shapiro test							Coefficient covariances computed by hccm()									Shapiro test
ANOVA Table (type II tests)									TREATMENT	variable	statistic	p				ANOVA Table (type II tests)									TREATMENT	variable	statistic	p
	Effect	DFn	DFd	F	p	p<.05			<fctr>	<chr>	<dbl>						Effect	DFn	DFd	F	p	p<.05	ges		<fctr>	<chr>	<dbl>
1	F1	2	9	3.311	0.08				Control	APX	0.944664	0.682961				1	F1	2	9	0.163	0.85		0.035		Control	APX	0.870934	0.301358
	Control	LMWD	STWD						LWD	APX	0.962797	0.796499					Df	Sum Sq	Mean Sq	F value	Pr(>F)				LWD	APX	0.953541	0.738288
Control	1	0.475306	0.154704						TWD	APX	0.898552	0.423901				data$F1	2	0.141	0.0706	0.163	0.852				TWD	APX	0.946589	0.69488
LWD	0.475306	1	0.154704													Residuals	9	3.895	0.4328
TWD	0.154704	0.154704	1						Homogeneity of variance assumption							---									Homogeneity of variance assumption
									Levene test							Signif. codes: 0 ‘***’ 0.001 ‘**’ 0.01 ‘*’ 0.05 ‘.’ 0.1 ‘ ’ 1									Levene test
									df1	df2	statistic	p				[1] 0.8519751									df1	df2	statistic	p
									<int>	<dbl>	<dbl>														<int>	<dbl>	<dbl>
Pairwise.t.test post-hoc									2	9	6.23726	0.0199727				Tukey test									2	9	0.507551	0.618219
	Letters																Letters
Control	a															Control	a
LWD	a															LWD	a
TWD	a															TWD	a
Dehydroascorbate reductase activty (DHAR)
Flag leaf																Ear
ANOVA variation with heteroscedasticity correction									Normality assumption							ANOVA									Normality assumption
Coefficient covariances computed by hccm()									Shapiro test							Coefficient covariances computed by hccm()									Shapiro test
ANOVA Table (type II tests)									TREATMENT	variable	statistic	p				ANOVA Table (type II tests)									TREATMENT	variable	statistic	p
	Effect	DFn	DFd	F	p	p<.05			<fctr>	<chr>	<dbl>						Effect	DFn	DFd	F	p	p<.05	ges		<fctr>	<chr>	<dbl>
1	F1	2	9	2.593	0.13				Control	DHAR	0.897621	0.419337				1	F1	2	9	0.523	0.61		0.104		Control	DHAR	0.97725	0.885714
	Control	LMWD	STWD						LWD	DHAR	0.805604	0.112655					Df	Sum Sq	Mean Sq	F value	Pr(>F)				LWD	DHAR	0.972304	0.855697
Control	1	0.339032	0.339032						TWD	DHAR	0.877516	0.328134				data$F1	2	0.404	0.2022	0.523	0.61				TWD	DHAR	0.986507	0.938964
LWD	0.339032	1	0.339032													Residuals	9	3.482	0.3869
TWD	0.339032	0.339032	1						Homogeneity of variance assumption							---									Homogeneity of variance assumption
									Levene test							Signif. codes: 0 ‘***’ 0.001 ‘**’ 0.01 ‘*’ 0.05 ‘.’ 0.1 ‘ ’ 1									Levene test
									df1	df2	statistic	p				[1] 0.6099457									df1	df2	statistic	p
									<int>	<dbl>	<dbl>														<int>	<dbl>	<dbl>
Pairwise.t.test post-hoc									2	9	46.6164	1.78211e-05				Tukey test									2	9	0.0926489	0.912371
	Letters																Letters
Control	a															Control	a
LWD	a															LWD	a
TWD	a															TWD	a
Monodehydroascorbate reductase (MDHAR)
Flag leaf																Ear
ANOVA									Normality assumption							ANOVA									Normality assumption
Coefficient covariances computed by hccm()									Shapiro test							Coefficient covariances computed by hccm()									Shapiro test
ANOVA Table (type II tests)									TREATMENT	variable	statistic	p				ANOVA Table (type II tests)									TREATMENT	variable	statistic	p
	Effect	DFn	DFd	F	p	p<.05	ges		<fctr>	<chr>	<dbl>						Effect	DFn	DFd	F	p	p<.05	ges		<fctr>	<chr>	<dbl>
1	F1	2	9	0.39	0.69		0.08		Control	MDHAR	0.857533	0.251501				1	F1	2	9	0.532	0.6		0.106		Control	MDHAR	0.959229	0.774059
	Df	Sum Sq	Mean Sq	F value	Pr(>F)				LWD	MDHAR	0.98854	0.949875					Df	Sum Sq	Mean Sq	F value	Pr(>F)				LWD	MDHAR	0.954821	0.746329
data$F1	2	0.00303	0.001516	0.39	0.688				TWD	MDHAR	0.827637	0.161725				data$F1	2	0.00433	0.002166	0.532	0.605				TWD	MDHAR	0.847597	0.218472
Residuals	9	0.03496	0.003885													Residuals	9	0.03664	0.004071
---									Homogeneity of variance assumption							---									Homogeneity of variance assumption
Signif. codes: 0 ‘***’ 0.001 ‘**’ 0.01 ‘*’ 0.05 ‘.’ 0.1 ‘ ’ 1									Levene test							Signif. codes: 0 ‘***’ 0.001 ‘**’ 0.01 ‘*’ 0.05 ‘.’ 0.1 ‘ ’ 1									Levene test
[1] 0.6877658									df1	df2	statistic	p				[1] 0.6047281									df1	df2	statistic	p
									<int>	<dbl>	<dbl>														<int>	<dbl>	<dbl>
Tukey test									2	9	0.749112	0.500115				Tukey test									2	9	0.464491	0.642717
	Letters																Letters
Control	a															Control	a
LWD	a															LWD	a
TWD	a															TWD	a
Glutathione reductase (GR)
Flag leaf																Ear
ANOVA									Normality assumption							ANOVA									Normality assumption
Coefficient covariances computed by hccm()									Shapiro test							Coefficient covariances computed by hccm()									Shapiro test
ANOVA Table (type II tests)									TREATMENT	variable	statistic	p				ANOVA Table (type II tests)									TREATMENT	variable	statistic	p
	Effect	DFn	DFd	F	p	p<.05	ges		<fctr>	<chr>	<dbl>						Effect	DFn	DFd	F	p	p<.05	ges		<fctr>	<chr>	<dbl>
1	F1	2	9	24.134	0	*	0.843		Control	GR	0.95465	0.745257				1	F1	2	9	1.122	0.37		0.2		Control	GR	0.801549	0.105027
	Df	Sum Sq	Mean Sq	F value	Pr(>F)				LWD	GR	0.915497	0.512005					Df	Sum Sq	Mean Sq	F value	Pr(>F)				LWD	GR	0.861223	0.264613
data$F1	2	0.04332	0.021658	2.933	0.000242	***			TWD	GR	0.861858	0.266916				data$F1	2	0.002496	0.001248	1.122	0.367				TWD	GR	0.846525	0.215103
Residuals	9	0.00808	0.000897													Residuals	9	0.010015	0.001113
---									Homogeneity of variance assumption							---									Homogeneity of variance assumption
Signif. codes: 0 ‘***’ 0.001 ‘**’ 0.01 ‘*’ 0.05 ‘.’ 0.1 ‘ ’ 1									Levene test							Signif. codes: 0 ‘***’ 0.001 ‘**’ 0.01 ‘*’ 0.05 ‘.’ 0.1 ‘ ’ 1									Levene test
[1] 0.0002417983									df1	df2	statistic	p				[1] 0.3673464									df1	df2	statistic	p
									<int>	<dbl>	<dbl>														<int>	<dbl>	<dbl>
Tukey test									2	9	0.306185	0.743625				Tukey test									2	9	2.83813	0.110744
	Letters																Letters
Control	a															Control	a
LWD	b															LWD	a
TWD	a															TWD	a

## Sheet: One-way ANOVA - Organs
Tables of one-way ANOVA analysis results for the effect of organs
3.5. Superoxide dismutase and catalase
Superoxide dismutase (SOD)
T-test										Normality assumption
	.y.	group1	group2	n1	n2	statistic	df	p		Shapiro test
	<chr>	<chr>	<chr>	<int>	<int>	<dbl>	<dbl>	<dbl>		ORGAN	variable	statistic	p
1	variable	Ear	Flag Leaf	12	12	6.83683	22	7.22e-07		<fctr>	<chr>	<dbl>
										Ear	SOD	0.907643	0.19899
T-test										Flag leaf	SOD	0.915236	0.248862
	Letters
Ear	a									Homogeneity of variance assumption
Flag leaf	b									Levene test
										df1	df2	statistic	p
										<int>	<dbl>	<dbl>
										1	22	0.939245	0.343007
Catalase (CAT)
T-test										Normality assumption
	.y.	group1	group2	n1	n2	statistic	df	p		Shapiro test
	<chr>	<chr>	<chr>	<int>	<int>	<dbl>	<dbl>	<dbl>		ORGAN	variable	statistic	p
1	variable	Ear	Flag Leaf	12	12	2.03145	22	0.0545		<fctr>	<chr>	<dbl>
										Ear	CAT	0.973975	0.947671
T-test										Flag leaf	CAT	0.933274	0.416111
	Letters
Ear	a									Homogeneity of variance assumption
Flag leaf	a									Levene test
										df1	df2	statistic	p
										<int>	<dbl>	<dbl>
										1	22	0.110068	0.743206
3.6. Ascorbate-glutathione cycle
Ascorbate peroxidase activity (APX)
Wilcox test with medians
	estimate	.y.	group1	group2	n1	n2	statistic	p	conf.low	conf.high	method	alternative	effsize	magnitude
	<dbl>	<chr>	<chr>	<chr>	<int>	<int>	<dbl>	<dbl>	<dbl>	<dbl>	<chr>	<chr>	<dbl>	<ord>
1	1.71655	variable	Ear	Flag Leaf	12	12	144	7.4e-07	0.906629	2.00468	Wilcoxon	two.sided	0.848528	large
T-test						Normality assumption					Homogeneity of variance assumption
	Letters					Shapiro test					Levene test
Ear	a					ORGAN	variable	statistic	p		df1	df2	statistic	p
Flag leaf	b					<fctr>	<chr>	<dbl>			<int>	<dbl>	<dbl>
						Ear	APX	0.879844	0.087245		1	22	17.3752	0.000399944
						Flag leaf	APX	0.75892	0.00331683
Dehydroascorbate reductase activty (DHAR)
Wilcox test with medians
	estimate	.y.	group1	group2	n1	n2	statistic	p	conf.low	conf.high	method	alternative	effsize	magnitude
	<dbl>	<chr>	<chr>	<chr>	<int>	<int>	<dbl>	<dbl>	<dbl>	<dbl>	<chr>	<chr>	<dbl>	<ord>
1	2.81636	variable	Ear	Flag Leaf	12	12	144	7.4e-07	2.47358	3.22801	Wilcoxon	two.sided	0.848528	large
T-test						Normality assumption					Homogeneity of variance assumption
	Letters					Shapiro test					Levene test
Ear	a					ORGAN	variable	statistic	p		df1	df2	statistic	p
Flag leaf	b					<fctr>	<chr>	<dbl>			<int>	<dbl>	<dbl>
						Ear	DHAR	0.960726	0.794138		1	22	10.9054	0.00324403
						Flag leaf	DHAR	0.708814	0.00102591
Monodehydroascorbate reductase activty (MDHAR)
T-test										Normality assumption
	.y.	group1	group2	n1	n2	statistic	df	p		Shapiro test
	<chr>	<chr>	<chr>	<int>	<int>	<dbl>	<dbl>	<dbl>		ORGAN	variable	statistic	p
1	variable	Ear	Flag Leaf	12	12	-0.527747	22	0.603		<fctr>	<chr>	<dbl>
										Ear	MDHAR	0.947396	0.599289
T-test										Flag leaf	MDHAR	0.970773	0.918731
	Letters
Ear	a									Homogeneity of variance assumption
Flag leaf	a									Levene test
										df1	df2	statistic	p
										<int>	<dbl>	<dbl>
										1	22	0.156081	0.696595
Glutathione reductase (GR)
Wilcox test with medians
	estimate	.y.	group1	group2	n1	n2	statistic	p	conf.low	conf.high	method	alternative	effsize	magnitude
	<dbl>	<chr>	<chr>	<chr>	<int>	<int>	<dbl>	<dbl>	<dbl>	<dbl>	<chr>	<chr>	<dbl>	<ord>
1	0.00850346	variable	Ear	Flag Leaf	12	12	82	0.59	-0.0802169	0.0344344	Wilcoxon	two.sided	0.117851	small
T-test						Normality assumption					Homogeneity of variance assumption
	Letters					Shapiro test					Levene test
Ear	a					ORGAN	variable	statistic	p		df1	df2	statistic	p
Flag leaf	a					<fctr>	<chr>	<dbl>			<int>	<dbl>	<dbl>
						Ear	GR	0.671984	0.000458726		1	22	4.48031	0.045833
						Flag leaf	GR	0.900774	0.162308
