# Supplementary material for: Physiological and Antioxidant Response to Different Water Deficit Regimes of Flag Leaves and Ears of Wheat Grown under Combined Elevated CO2 and High Temperature
Source: Plants (Basel). 2022 Sep 13;11(18):2384. doi: 10.3390/plants11182384 (PMC9504337; doi:10.3390/plants11182384)
Supplement: Supplementary file 1 [file plants-11-02384-s001.zip › Spreadsheet S2_plants-1881609.xlsx]

## Sheet: Hoja1
ORDER	ID	ORGAN	TREATMENT	FW	DW	MC%	Area	DMA	Chl	A	gs	Ci	Vcmax	Jmax	Rd	WUE	E	Pro	AsA	GSH	SOD	CAT	APX	DHAR	MDHAR	GR
1	L_C1	Flag Leaf	Control	0.423667	0.129917	69.3352	18.3717	0.00707158	71.5123	27.2	0.475	746.5	66.9773	141.843	1.54265	3.945	6.895	1.40681	1.46825	0.453381	49.1659	460.268	1.73917	0.0997733	0.352345	0.142818
2	L_C2	Flag Leaf	Control	0.389333	0.12585	67.6755	14.1483	0.00889504	71.7707	26	0.515	745	61.2149	144.498	2.40662	3.815	6.815	0.882953	1.52707	0.411713	66.2162	444.22	1.73917	0.105609	0.239867	0.0914899
3	L_C3	Flag Leaf	Control	0.515167	0.160183	68.9065	16.19	0.00989397	65.6259	18.05	0.124	617.5	46.1327	117.607	2.68387	4.005	2.665	0.580693	1.5611	0.407626	67.0773	524.674	1.68034	0.101803	0.179017	0.0791346
4	L_C4	Flag Leaf	Control	0.514	0.1668	67.5486	18.2133	0.00915813	68.4425	20.7	0.2825	730	53.1136	111.889	2.24058	4.255	4.865	0.661359	1.55186	0.374133	82.4055	347.718	1.79801	0.115252	0.18824	0.0525168
5	L_LWD1	Flag Leaf	LWD	0.278333	0.109267	60.7425	9.55667	0.0114336	70.8877	40.2	0.504	680.5	88.4989	215.168	1.05163	4.45167	7.135	3.02201	1.1591	0.381236	46.965	596.366	1.70756	0.0952661	0.222407	0.205694
6	L_LWD2	Flag Leaf	LWD	0.237133	0.100367	57.675	7.845	0.0127937	74.9311	33	0.6415	734	79.7976	167.679	1.62547	4.26	7.745	3.47872	1.21767	0.43121	41.3201	577.155	1.71586	0.0994095	0.304285	0.244884
7	L_LWD3	Flag Leaf	LWD	0.200683	0.0996167	50.3613	4.63667	0.0214845	70.1339	37.05	0.7195	728	81.5083	192.23	1.10836	4.57	8.1	3.93757	0.597669	0.338294	50.3769	591.132	1.76549	0.0410509	0.246571	0.200326
8	L_LWD4	Flag Leaf	LWD	0.116367	0.0638667	45.116	2.805	0.0227689	64.5828	28.8	0.435	715	65.1216	152.051	1.39558	4.525	6.36	1.64975	0.995335	0.246789	39.6514	599.874	1.67454	0.0341932	0.149494	0.183757
9	L_TWD1	Flag Leaf	TWD	0.5095	0.154283	69.7187	19.5533	0.00789039	70.1366	35.7	0.6925	757.5	91.2647	175.998	1.25812	4.455	8.02	0.540309	1.5396	0.44193	38.0182	480.127	1.29703	0.101098	0.25466	0.0780841
10	L_TWD2	Flag Leaf	TWD	0.4365	0.134367	69.2173	16.8867	0.00795697	70.3235	27.4	0.5665	765.5	72.6674	176.551	1.05272	3.8	7.21	1.06225	1.71005	0.3658	37.357	512.481	1.69209	0.0873335	0.258704	0.0819801
11	L_TWD3	Flag Leaf	TWD	0.45555	0.1399	69.2899	18.1917	0.00769033	68.1009	35.15	0.5785	732.5	85.2061	176.246	1.42335	5	7.025	0.718714	1.65585	0.453219	57.396	536.849	1.27144	0.0969674	0.240117	0.0937634
12	L_TWD4	Flag Leaf	TWD	0.3792	0.12825	66.1788	12.465	0.0102888	70.2213	34.6	0.573	735	77.5132	177.409	1.22874	4.84	7.145	0.494325	1.71791	0.338178	72.8877	398.314	1.49768	0.10247	0.318725	0.0380415
13	E_C1	Ear	Control	2.769	1.04083	62.4112	38.4067	0.0271003										1.45963	2.02642	0.3897	114.39	289.545	2.50097	0.562863	0.29799	0.113857
14	E_C2	Ear	Control	3.2205	1.2553	61.0216	40.5733	0.030939										2.10712	0.669208	0.367581	113.748	478.651	3.51659	0.701089	0.266888	0.0874875
15	E_C3	Ear	Control	3.36083	1.35817	59.5884	44.1767	0.030744										1.51957	1.0959	0.362866	110.535	330.909	3.73846	0.617085	0.148868	0.0944254
16	E_C4	Ear	Control	3.42867	1.4055	59.0074	43.9233	0.0319989										1.60793	1.55044	0.350178	106.86	511.174	2.26948	0.778784	0.19998	0.0877886
17	E_LWD1	Ear	LWD	3.04168	1.09017	64.1591	43.65	0.0249752										3.08115	1.39068	0.312234	108.06	381.845	2.21153	0.455774	0.223523	0.210029
18	E_LWD2	Ear	LWD	2.41702	0.867433	64.1114	34.5567	0.0251018										1.8297	0.775102	0.281822	74.5891	524.929	3.76718	0.80727	0.186833	0.0869512
19	E_LWD3	Ear	LWD	2.4949	0.887933	64.4101	37.9067	0.0234242										3.00723	2.23314	0.308026	92.1246	334.686	2.97701	0.642186	0.35743	0.0949512
20	E_LWD4	Ear	LWD	1.64365	0.948511	64.7228	25.7067	0.0225558										1.99016	0.986774	0.265082	102.158	461.123	3.48001	0.617398	0.266671	0.129799
21	E_TWD1	Ear	TWD	2.77867	1.03515	62.7465	41.0067	0.0252435										4.61938	1.2041	0.278645	142.304	581.558	3.6086	0.536102	0.1832	0.106743
22	E_TWD2	Ear	TWD	2.60467	0.951817	63.4573	38.24	0.0248906										5.04442	0.619252	0.263103	148.018	415.089	2.58117	0.702094	0.176444	0.113494
23	E_TWD3	Ear	TWD	2.72962	0.954033	65.0488	40.8433	0.0233584										4.89419	1.04696	0.350787	101.605	428.686	3.80268	0.464985	0.28181	0.10354
24	E_TWD4	Ear	TWD	2.64113	0.934533	64.6162	39.2967	0.0237815										3.91953	1.27301	0.312677	177.29	483.616	3.08709	0.623139	0.209897	0.103196
